# Supplementary material for: Exploring the Relationship between Running-Related Technology Use and Running-Related Injuries: A Cross-Sectional Study of Recreational and Elite Long-Distance Runners
Source: MDPI journal article supplement (doi:10.3390/healthcare12060642), 2024-03-13
Supplement: s1 [file s1]

# Wearable Technology and Running Survey

This survey is for research purposes only. The purpose of this survey is to collect data on wearable technology usage in runners. Please only fill out if you have trained for a race  $\geq 10$  km in the past 12 months. No identifying information will be collected and all participation is voluntary. By completing this survey, you are agreeing to have your answers included in this research investigation.

**1. Age:** \_\_\_\_\_

**2. Sex:**

☐ Female

☐ Male

☐ Other: \_\_\_\_\_

**3. Ethnicity:**

☐ Asian/Pacific Islander

☐ Native American

☐ Black/African American

☐ White

☐ Hispanic/Latino

☐ Other: \_\_\_\_\_

**4. How Long Have You Been Running regularly?**

☐ 0-5 Years

☐ 16-20 Years

☐ 6-10 Years

☐ 21+ Years

☐ 11-15 Years

**5. Which of the Following Best Describes You?**

☐ Run Recreationally to Stay Fit – Do Not Participate in Organized Competition

☐ Run 7-9 Races Per Year

☐ Run 10+ Races Per Year

☐ Run 1-3 Races Per Year

☐ Run at the Elite Level (Collegiate or Professional)

☐ Run 4-6 Races Per Year

**6. What Events Do You Typically Train For (click all that apply)?**

☐ 10 km (6.2 miles)

☐ Half-Marathon  
(13.1 miles)

☐ 30 km (18.6 miles)

☐ 15 km (9.3 miles)

☐ 25 km (15.5 miles)

☐ Marathon (26.2 miles)

☐ 20 km (12.4 miles)

- ☐ Ironman ☐ N/A ☐ Other: \_\_\_\_\_  
☐ Ultramarathon \_\_\_\_\_

**7. In the Past 12 months, How Many Events Did You Train For and Run?**

---

**8. Are You Currently Training for An Event?**

- ☐ Yes  
☐ No

**9. How Many Days Per Week Do You Typically Run?**

- ☐ 0-1 Days/Week ☐ 4-5 Days/Week  
☐ 2-3 Days/Week ☐ 6-7 Days/Week

**10. How Many Miles Per Week Do You Typically Run?**

- ☐ 0-10 Miles  
☐ 11-20 Miles  
☐ 21-30 miles  
☐ 31-40 Miles  
☐ 40+ Miles

**11. Do You Ever Use Smart Technology to Track runs? i.e. Smart Watch or Phone Application?**

- ☐ Yes  
☐ No  
☐ Sometimes

**12. If Yes To The Question Above, Do You Use a Smartwatch Or An Application On Your Phone to Track Data?**

- ☐ Smartwatch  
☐ Smartphone App  
☐ Both

☐ Other: \_\_\_\_\_

**13. If You Use A Smartwatch, Which Device Brand Are You Currently Using?**

☐ Apple Watch

☐ Whoop

☐ Garmin

☐ Timex

☐ Fitbit

☐ Other: \_\_\_\_\_

☐ Polar

**14. What Parameters Do You Typically Track (click all that apply)?**

☐ Activity Time

☐ Pace

☐ Ground Contact  
Time

☐ Heart Rate

☐ Calories

☐ Distance  
Improvement

☐ Heart Rate Zone

☐ Altitude Change

☐ Pace Improvement

☐ Respiratory Rate

☐ Cadence

☐ Other: \_\_\_\_\_

☐ VO2max

☐ Stride Length

☐ Distance

**15. Do You Use This Information To Make Future Training Decisions?**

i.e. Answering yes to this question means that the information provided in the previous question is used to adjust for training variables such as distance, pace, or running frequency in the proceeding days

☐ Yes

☐ No

☐ Sometimes

**16. While Training For A competitive Event  $\geq 10$  km Race In The Last Year, Did You Suffer A running-Related Injury?**

A Running-Related Injury (RRI) is defined in this study as an injury sustained from running that caused a modification in distance, pace, or frequency OR caused you to stop running for 7 days or 3 consecutive scheduled training sessions.

☐ Yes

☐ No

**17. Approximately how many running related injuries did you sustain while training for your event? \_\_\_\_\_**

**18. What Parts of the Body Were Affected By Injury? (Select all that apply)**

- |                                       |                                    |
|---------------------------------------|------------------------------------|
| <input type="radio"/> Hip             | <input type="radio"/> Lower Leg    |
| <input type="radio"/> Knee            | <input type="radio"/> Hamstring    |
| <input type="radio"/> Ankle           | <input type="radio"/> Lower Back   |
| <input type="radio"/> Foot            | <input type="radio"/> Other: _____ |
| <input type="radio"/> Achilles Tendon |                                    |

**19. Have You Injured That Part of The Body Previously?**

- ☐ Yes
- ☐ No

**20. When Returning Back To Running After An Injury, What Metrics on your smart device Do You Use To Guide Your Training?**

- |                                        |                                           |                                            |
|----------------------------------------|-------------------------------------------|--------------------------------------------|
| <input type="radio"/> Activity Time    | <input type="radio"/> Calories            | <input type="radio"/> Distance Improvement |
| <input type="radio"/> Heart Rate       | <input type="radio"/> Altitude Change     | <input type="radio"/> Pace Improvement     |
| <input type="radio"/> Heart Rate Zone  | <input type="radio"/> Cadence             | <input type="radio"/> Other: _____         |
| <input type="radio"/> Respiratory Rate | <input type="radio"/> Stride Length       | _____                                      |
| <input type="radio"/> Distance         | <input type="radio"/> Ground Contact Time |                                            |
| <input type="radio"/> Pace             |                                           |                                            |

**21. Do You Feel That Using Wearable Technology Helps To Prevent Running-Related Injuries?**

- ☐ Yes
- ☐ No

**22. In The Last 12 months, Did You Receive a Positive PCR test for COVID-19?**

- ☐ Yes
- ☐ No

**23. Did You Track any Metrics During This Period With Your Smart device?**

- ☐ Yes
- ☐ No

**24. If So, Which Metrics Did You Track?**

- |                                        |                                           |                                            |
|----------------------------------------|-------------------------------------------|--------------------------------------------|
| <input type="radio"/> Activity Time    | <input type="radio"/> Calories            | <input type="radio"/> Distance Improvement |
| <input type="radio"/> Heart Rate       | <input type="radio"/> Altitude Change     | <input type="radio"/> Pace Improvement     |
| <input type="radio"/> Heart Rate Zone  | <input type="radio"/> Cadence             | <input type="radio"/> Other: _____         |
| <input type="radio"/> Respiratory Rate | <input type="radio"/> Stride Length       | _____                                      |
| <input type="radio"/> Distance         | <input type="radio"/> Ground Contact Time |                                            |
| <input type="radio"/> Pace             |                                           |                                            |

**25. Did You Notice Any Changes in These Metrics?**

- ☐ Yes
- ☐ No

**26. If So, Which Metrics Did You Notice A Change In?**

- |                                        |                                           |                                            |
|----------------------------------------|-------------------------------------------|--------------------------------------------|
| <input type="radio"/> Activity Time    | <input type="radio"/> Calories            | <input type="radio"/> Distance Improvement |
| <input type="radio"/> Heart Rate       | <input type="radio"/> Altitude Change     | <input type="radio"/> Pace Improvement     |
| <input type="radio"/> Heart Rate Zone  | <input type="radio"/> Cadence             | <input type="radio"/> Other: _____         |
| <input type="radio"/> Respiratory Rate | <input type="radio"/> Stride Length       | _____                                      |
| <input type="radio"/> Distance         | <input type="radio"/> Ground Contact Time |                                            |
| <input type="radio"/> Pace             |                                           |                                            |

**27. How long after diagnosis of COVID19 did you resume starting to run? \_\_\_\_\_**

**28. Did you notice any difference in your metrics on your smart watch when resuming running again?**

- ☐ Yes
- ☐ No

**29. If So, Which Metrics Did You Notice A Change In?**

- ☐ Activity Time
- ☐ Heart Rate
- ☐ Heart Rate Zone
- ☐ Respiratory Rate

- ☐ Distance
- ☐ Pace
- ☐ Calories
- ☐ Altitude Change
- ☐ Cadence
- ☐ Stride Length
- ☐ Ground Contact Time

**30. Do You Feel That Smartwatches Provide an Accurate Means for Tracking Non-Exercise Metrics?**

- ☐ Yes
- ☐ No
