# Supplementary material for: Exploring the Relationship between Running-Related Technology Use and Running-Related Injuries: A Cross-Sectional Study of Recreational and Elite Long-Distance Runners
Source: MDPI journal article supplement (doi:10.3390/healthcare12060642), 2024-03-13

# CALLING ALL RUNNERS. SEEKING STUDY PARTICIPANTS.

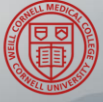

**Weill  
Cornell  
Medicine**

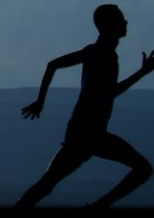

## STUDY AIM?

This study seeks to better understand the current use of wearable technology by runners and the potential relationship with running-related injuries

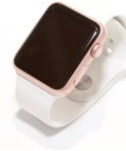

## KNOWLEDGE IS POWER

The knowledge gained from this investigation will provide runners with insight into:

- Commonly Tracked Running Metrics
- Latest Running Trends
- Potential Roles of Wearable Technology

## HOW CAN YOU GET INVOLVED?

You can complete a one-time survey at the following address or by scanning the QR code:

<https://redcap.link/wearabletechandrunningsurvey>

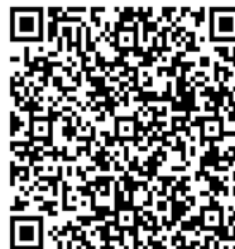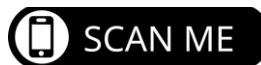

## ARE YOU ELIGIBLE?

Currently training or trained  
& ran in a race  $\geq 10K$  in  
the last 12 months

**QUESTIONS OR  
ELIGIBILITY INQUIRIES-  
CONTACT A MEMBER OF  
OUR STUDY TEAM:**

**ZACHARY SMITH**  
[ZCS4001@MED.CORNELL.EDU](mailto:ZCS4001@MED.CORNELL.EDU)

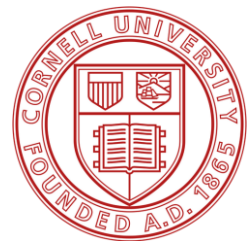

Supplement: s1 [file s1]
